# Supplementary material for: Resistant Genes and Multidrug-Resistant Bacteria in Wastewater: A Study of Their Transfer to the Water Reservoir in the Czech Republic
Source: MDPI journal article supplement (doi:10.3390/life12020147), 2022-01-20
Supplement: s1 [file s1]

# Resistant Genes and Multidrug-Resistant Bacteria in Wastewater: A Study of Their Transfer to the Water Reservoir in the Czech Republic

Tereza Stachurová, Nikola Sýkorová, Jaroslav Semerád and Kateřina Malachová

## Supplementary Materials:

**Table S1.** Sequences of primers and PCR conditions used in the study.

| Gene                                     | Primer       | 5'-3' Sequence                       | Standard PCR Conditions                                          | Reference                 |
|------------------------------------------|--------------|--------------------------------------|------------------------------------------------------------------|---------------------------|
| 16S rRNA                                 | F1048        | GTGSTGCAYGGYT                        | 94°C 3 min, 40× (94°C 15 s, 60°C 60 s)                           | Marti et al. 2013         |
|                                          | R1194        | GTCGTCA<br>ACGTCRTCCM-<br>CACCTTCCTC |                                                                  |                           |
| 16S rRNA<br>(identification of bacteria) | 984F         | AACGCGAAGAAC-<br>CTTAC               | 95°C 2 min, 35× (95°C 45s, 55°C 30 s, 72°C 60 s), 72°C 10 min    | Heuer et al. 1997         |
|                                          | 1378R        | CGGTGTG-<br>TACAAGGCCCGG-<br>GAACG   |                                                                  |                           |
| <i>bla</i> TEM                           | bla-TEM-RX   | CTTTATCCGCCTC<br>CATCCAGTCTA         | 94°C 2 min, 40× (94°C 15s, 60°C 30s, 72°C 45 s), 72°C 10 min     | Marti et al. 2013         |
|                                          | bla-TEM-FX   | GCK-<br>GCCAACTTACTTC<br>TGACAACG    |                                                                  |                           |
| <i>bla</i> NDM-1                         | NDM-Rm       | CGGAATGGCTCAT<br>CACGATC             | 94°C 2 min, 40× (94°C 15s, 53°C 30 s, 72°C 45 s), 72°C 10 min    | Poirel et al. 2011        |
|                                          | NDM-Fm       | GGTTT-<br>GGCGATCTGGTTT<br>TC        |                                                                  |                           |
| <i>bla</i> OXA-48                        | bla-OXA-48-R | GAGCACTTCTTTT-<br>GTGATGGC           | 95°C 5 min, 35× (95°C 1 min, 56°C 1 min, 72°C 1 min), 72°C 5 min | Mlynarcik et al. 2016     |
|                                          | bla-OXA-48-F | TTGGTGG-<br>CATCGATTATCGG            |                                                                  |                           |
| <i>bla</i> KPC                           | bla-KPC-R    | TTACTGCCCCGTTG<br>A CGCCC            | 94°C 3 min, 30× (94°C 1 min, 55°C 1 min, 72°C 1 min), 72°C 5 min | Ribeiro et al. 2016       |
|                                          | bla-KPC-F    | ATGTCACTG-<br>TATCGCCGTCT            |                                                                  |                           |
| <i>mecA</i>                              | mecA-LP      | GATAGCAGTTA-<br>TATTTCTA             | 95°C 5 min, 35× (94°C 15 s, 48°C 60 s, 72°C 80 s), 72°C 4 min    | Colomer-Lluch et al. 2011 |
|                                          | mecA-UP      | ATACTTAG-<br>TTCTTTAGCGAT<br>GGGCG-  |                                                                  |                           |
| <i>tetW</i>                              | tet(W)-RV    | TATCCACAATGTT<br>AAC                 | 94°C 2 min, 40× (94°C 15 s, 60°C 30 s, 72°C 45 s), 72°C 10 min   | Marti et al. 2013         |
|                                          | tet(W)-FW    | GAGAGCCTGCTA-<br>TATGCCAGC           |                                                                  |                           |
| <i>vanA</i>                              | vanA-R       | GATTCCGTACTG-<br>CAGCCTGATT          | 94°C 3min, 40× (94°C 15 s, 60°C 30 s, 72°C 60 s), 72°C 10 min    | Rathnayake et al. 2012    |
|                                          | vanA-F       | TGTGCGG-<br>TATTGGGAAACAG            |                                                                  |                           |

**Table S2.** Efficiency of qPCR assays retrieved from standard curves. Sampling times: A – December, B – August, C – November.

| Sampling | qPCR Assay       | Efficiency [%] | R <sup>2</sup> | Limit of Quantification (Copy Number) |
|----------|------------------|----------------|----------------|---------------------------------------|
| A        | rDNA             | 97.64          | 0.996          | 20.1                                  |
|          | <i>bla</i> TEM   | 96.24          | 0.995          | 22.5                                  |
|          | <i>bla</i> NDM-1 | 99.26          | 0.997          | 27.9                                  |
|          | <i>tet</i> W     | 98.75          | 0.993          | 24.4                                  |
|          | <i>van</i> A     | 95.99          | 0.995          | 27.5                                  |
| B        | rDNA             | 95.98          | 0.995          | 20.4                                  |
|          | <i>bla</i> TEM   | 96.73          | 0.996          | 22.1                                  |
|          | <i>bla</i> NDM-1 | 97.11          | 0.994          | 27.8                                  |
|          | <i>tet</i> W     | 96.08          | 0.997          | 23.8                                  |
|          | <i>van</i> A     | 97.42          | 0.994          | 28.3                                  |
| C        | rDNA             | 96.18          | 0.997          | 19.9                                  |
|          | <i>bla</i> TEM   | 97.16          | 0.998          | 21.8                                  |
|          | <i>bla</i> NDM-1 | 98.75          | 0.997          | 28.2                                  |
|          | <i>tet</i> W     | 92.66          | 0.996          | 24.1                                  |
|          | <i>van</i> A     | 96.09          | 0.997          | 27.6                                  |

**Table S3.** Growth curves parameters of ampicillin-resistant isolates from the nitrification and sedimentation tanks of the wastewater treatment plant and dam at different sampling campaign (A – December, B – August, C – November). The growth curves measured every 30 min 24 h at 600 nm and 30 °C. N, nitrification tank; S, sedimentation tank; D, dam.

| Isolate | Growth Rate (h) | lag Phase (h)  | Doubling Time (h) |
|---------|-----------------|----------------|-------------------|
| N1_A    | 1.388 ± 0.006   | 2.146 ± 0.116  | 0.500 ± 0.002     |
| N2_A    | 0.794 ± 0.157   | 10.893 ± 0.094 | 0.897 ± 0.087     |
| N3_A    | 1.325 ± 0.064   | 5.896 ± 0.178  | 0.524 ± 0.025     |
| N4_A    | 0.649 ± 0.053   | 9.152 ± 0.085  | 1.072 ± 0.091     |
| S1_A    | 0.403 ± 0.005   | 5.382 ± 0.272  | 1.718 ± 0.023     |
| S2_A    | 0.804 ± 0.147   | 2.897 ± 0.149  | 0.880 ± 0.152     |
| S3_A    | 0.589 ± 0.136   | 7.288 ± 0.167  | 1.217 ± 0.261     |
| D1_A    | 0.714 ± 0.010   | 11.239 ± 0.086 | 0.971 ± 0.013     |
| N1_B    | 4.242 ± 0.063   | 12.073 ± 0.140 | 0.160 ± 0.002     |
| N2_B    | 6.584 ± 0.065   | 0.556 ± 0.087  | 0.100 ± 0.001     |
| N3_B    | 0.646 ± 0.062   | 8.886 ± 0.113  | 1.079 ± 0.099     |
| N4_B    | 7.739 ± 0.280   | 1.982 ± 0.212  | 0.089 ± 0.005     |
| N5_B    | 1.227 ± 0.052   | 10.407 ± 0.062 | 0.560 ± 0.002     |
| N6_B    | 1.113 ± 0.083   | 9.927 ± 0.132  | 0.625 ± 0.045     |
| N7_B    | 5.873 ± 0.102   | 0.747 ± 0.018  | 0.110 ± 0.002     |
| N8_B    | 0.508 ± 0.129   | 5.427 ± 0.098  | 1.422 ± 0.350     |
| N9_B    | 1.396 ± 0.023   | 4.956 ± 0.079  | 0.490 ± 0.008     |
| N10_B   | 0.438 ± 0.016   | 6.182 ± 0.061  | 1.584 ± 0.057     |
| S1_B    | 6.191 ± 0.060   | 0.779 ± 0.065  | 0.110 ± 0.001     |
| S2_B    | 5.515 ± 0.780   | 1.859 ± 0.143  | 0.130 ± 0.007     |
| S3_B    | 3.194 ± 0.321   | 8.442 ± 0.329  | 0.210 ± 0.002     |
| S4_B    | 7.067 ± 0.379   | 0.968 ± 0.099  | 0.100 ± 0.005     |
| S5_B    | 5.621 ± 0.102   | 0.813 ± 0.079  | 0.120 ± 0.002     |
| S6_B    | 5.006 ± 0.027   | 0.951 ± 0.024  | 0.140 ± 0.007     |
| S7_B    | 3.068 ± 0.241   | 0.853 ± 0.035  | 0.227 ± 0.018     |
| S8_B    | 0.792 ± 0.173   | 7.465 ± 0.200  | 0.901 ± 0.180     |
| S9_B    | 5.031 ± 0.170   | 1.522 ± 0.364  | 0.140 ± 0.004     |
| S10_B   | 7.308 ± 0.540   | 1.636 ± 0.252  | 0.095 ± 0.002     |
| D1_B    | 2.998 ± 0.131   | 4.466 ± 0.271  | 0.230 ± 0.009     |
| D2_B    | 5.980 ± 0.553   | 0.799 ± 0.013  | 0.120 ± 0.001     |
| D3_B    | 4.614 ± 0.044   | 1.239 ± 0.133  | 0.150 ± 0.006     |
| D4_B    | 3.107 ± 0.063   | 5.829 ± 0.155  | 0.220 ± 0.004     |
| D5_B    | 5.648 ± 0.145   | 2.154 ± 0.346  | 0.120 ± 0.002     |
| D6_B    | 3.211 ± 0.042   | 5.844 ± 0.156  | 0.220 ± 0.005     |
| D7_B    | 2.903 ± 0.019   | 5.855 ± 0.182  | 0.240 ± 0.001     |

|       |                   |                    |                    |
|-------|-------------------|--------------------|--------------------|
| D8_B  | $9.808 \pm 0.574$ | $0.635 \pm 0.049$  | $0.071 \pm 0.001$  |
| D9_B  | $5.648 \pm 0.078$ | $1.228 \pm 0.126$  | $0.120 \pm 0.002$  |
| D10_B | $5.349 \pm 0.551$ | $1.651 \pm 0.294$  | $0.130 \pm 0.001$  |
| N1_C  | $1.619 \pm 0.002$ | $0.100 \pm 0.001$  | $42.810 \pm 0.309$ |
| N2_C  | $4.997 \pm 0.006$ | $4.941 \pm 0.209$  | $13.873 \pm 0.163$ |
| N3_C  | $1.932 \pm 0.006$ | $0.201 \pm 0.043$  | $35.891 \pm 0.110$ |
| N4_C  | $2.421 \pm 0.004$ | $1.078 \pm 0.105$  | $28.632 \pm 0.452$ |
| N5_C  | $1.408 \pm 0.001$ | $0.386 \pm 0.042$  | $49.233 \pm 0.171$ |
| S1_C  | $1.505 \pm 0.018$ | $8.428 \pm 0.151$  | $46.524 \pm 0.578$ |
| S2_C  | $0.969 \pm 0.002$ | $13.848 \pm 0.319$ | $74.281 \pm 0.674$ |
| S3_C  | $1.964 \pm 0.001$ | $0.010 \pm 0.001$  | $35.285 \pm 0.256$ |
| S4_C  | $1.812 \pm 0.003$ | $4.319 \pm 0.249$  | $38.251 \pm 0.731$ |
| S5_C  | $2.948 \pm 0.015$ | $0.015 \pm 0.002$  | $23.556 \pm 0.126$ |
| D1_C  | $1.136 \pm 0.002$ | $10.282 \pm 0.161$ | $61.001 \pm 1.113$ |

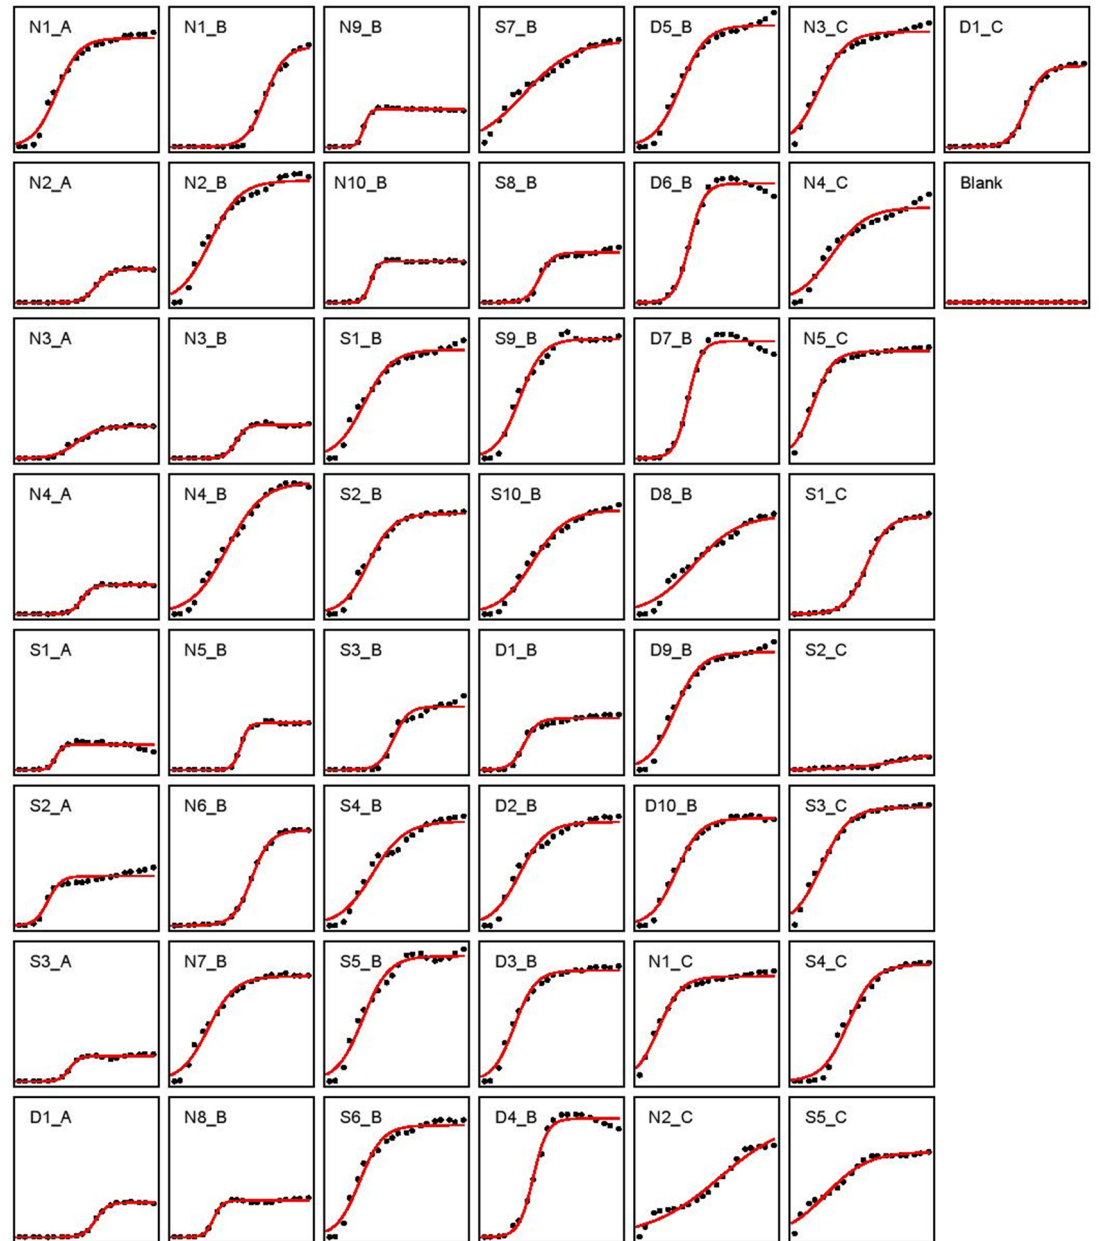

**Figure S1.** Growth curves of ampicillin-resistant isolates from the nitrification and sedimentation tanks of the wastewater treatment plant and dam at different sampling campaign (A – December, B – August, C – November). The growth curves measured every 30 min 24 h at 600 nm and 30 °C. N, nitrification tank; S, sedimentation tank; D, dam.

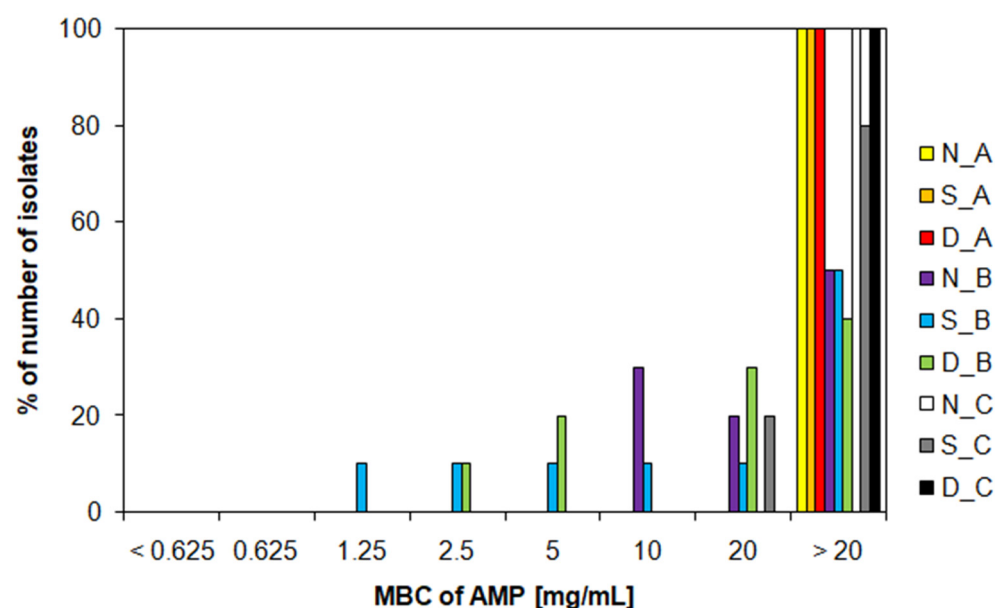

**Figure S2.** Frequency of minimum bactericidal concentration values for ampicillin determined in ampicillin-resistant isolates from the water samples from the nitrification and sedimentation tanks of the wastewater treatment plant and dam at different sampling campaign (A – December, B – August, C – November). AMP, ampicillin; MBC, minimum bactericidal concentration; N, nitrification tank; S, sedimentation tank; D, dam.

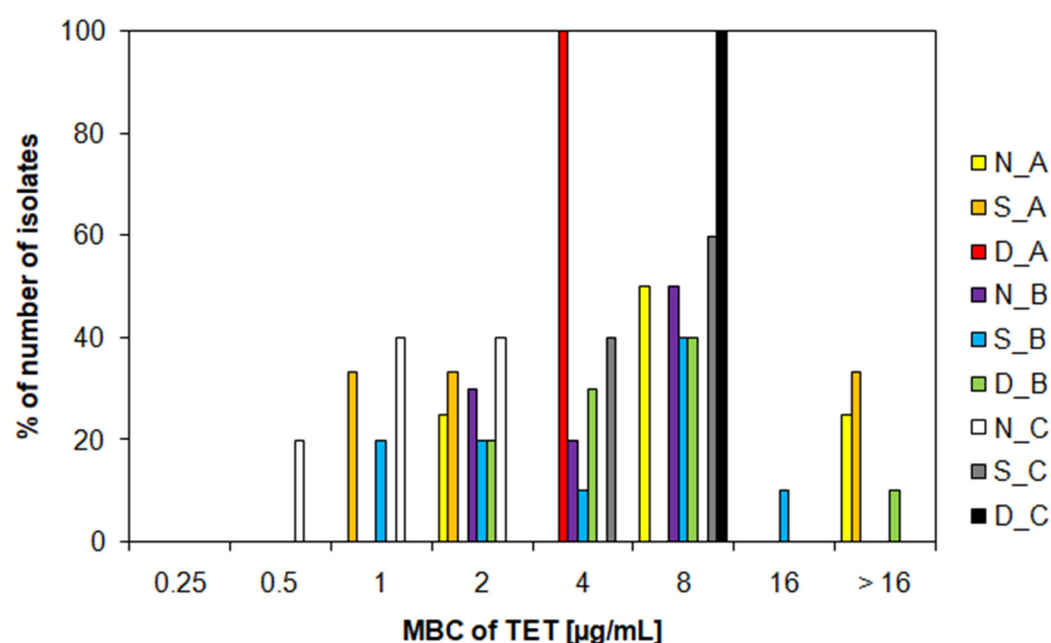

**Figure S3.** Frequency of minimum bactericidal concentration values for tetracycline determined in ampicillin-resistant isolates from the water samples from the nitrification and sedimentation tanks of the wastewater treatment plant and dam at different sampling campaign (A – December, B – August, C – November). TET, tetracycline; MBC, minimum bactericidal concentration; N, nitrification tank; S, sedimentation tank; D, dam.
